# Supplementary material
Source: PubMed Central journal article supplement (PMC3168324)
Supplement: supp_amiajnl-2011-000281_Supplement.pdf [file supp_amiajnl-2011-000281_Supplement.pdf]

**Table S1.** Descriptive statistics of respondents' demographics and usage characteristics by survey method. Number of respondents categorized by age, professional role, system access time, and computer literacy are shown for each survey method, online and paper. (Values in italics indicate the percentage of respondents per survey method.)

| <b>Age</b>                     | <b>Online</b> |             | <b>Paper</b> |             | <b>Total</b> |             |
|--------------------------------|---------------|-------------|--------------|-------------|--------------|-------------|
| Under 31                       | 20            | <i>21.3</i> | 16           | <i>28.1</i> | 36           | <i>23.8</i> |
| 31 to Under 43                 | 24            | <i>25.5</i> | 13           | <i>22.8</i> | 37           | <i>24.5</i> |
| 43 to Under 59                 | 23            | <i>24.5</i> | 15           | <i>26.3</i> | 38           | <i>25.2</i> |
| 59 And Older                   | 27            | <i>28.7</i> | 13           | <i>22.8</i> | 40           | <i>26.5</i> |
| Total                          | 94            | <i>100</i>  | 57           | <i>100</i>  | 151          | <i>100</i>  |
| <b>Professional Role</b>       |               |             |              |             |              |             |
| RN/PA/LPN/Other                | 39            | <i>37.9</i> | 22           | <i>37.9</i> | 61           | <i>37.9</i> |
| NP/MD                          | 64            | <i>62.1</i> | 36           | <i>62.1</i> | 100          | <i>62.1</i> |
| Total                          | 103           | <i>100</i>  | 58           | <i>100</i>  | 161          | <i>100</i>  |
| <b>System Access Time</b>      |               |             |              |             |              |             |
| Less than 1 year               | 26            | <i>24.8</i> | 10           | <i>16.7</i> | 36           | <i>21.8</i> |
| 1 year to less than 2          | 41            | <i>39.1</i> | 25           | <i>41.7</i> | 66           | <i>40.0</i> |
| 2 to less than 3 years         | 27            | <i>25.7</i> | 19           | <i>31.7</i> | 46           | <i>27.9</i> |
| 3 years or more                | 11            | <i>10.5</i> | 6            | <i>10.0</i> | 17           | <i>10.3</i> |
| Total                          | 105           | <i>100</i>  | 60           | <i>100</i>  | 165          | <i>100</i>  |
| <b>Computer Literacy Score</b> |               |             |              |             |              |             |
| 0                              | 2             | <i>2.1</i>  | 0            | <i>0.0</i>  | 2            | <i>1.3</i>  |
| 1                              | 3             | <i>3.2</i>  | 0            | <i>0.0</i>  | 3            | <i>2.0</i>  |
| 2                              | 0             | <i>0.0</i>  | 1            | <i>1.8</i>  | 1            | <i>0.7</i>  |
| 3                              | 1             | <i>1.1</i>  | 0            | <i>0.0</i>  | 1            | <i>0.7</i>  |
| 5                              | 2             | <i>2.1</i>  | 3            | <i>5.4</i>  | 5            | <i>3.3</i>  |

|       |    |      |    |      |     |     |
|-------|----|------|----|------|-----|-----|
| 6     | 1  | 1.1  | 3  | 5.4  | 4   | 2.7 |
| 7     | 3  | 3.2  | 2  | 3.6  | 5   | 3.3 |
| 8     | 1  | 1.1  | 2  | 3.6  | 3   | 2.0 |
| 9     | 6  | 6.3  | 6  | 10.7 | 12  | 8.0 |
| 10    | 3  | 3.2  | 1  | 1.8  | 4   | 2.7 |
| 11    | 4  | 4.2  | 3  | 5.4  | 7   | 4.6 |
| 12    | 4  | 4.2  | 1  | 1.8  | 5   | 3.3 |
| 13    | 5  | 5.3  | 2  | 3.6  | 7   | 4.6 |
| 14    | 6  | 6.3  | 1  | 1.8  | 7   | 4.6 |
| 15    | 6  | 6.3  | 4  | 7.1  | 10  | 6.6 |
| 16    | 2  | 2.1  | 3  | 5.4  | 5   | 3.3 |
| 17    | 3  | 3.2  | 3  | 5.4  | 6   | 4.0 |
| 18    | 7  | 7.4  | 6  | 10.7 | 13  | 8.6 |
| 19    | 10 | 10.5 | 3  | 5.4  | 13  | 8.6 |
| 20    | 7  | 7.4  | 3  | 5.4  | 10  | 6.6 |
| 21    | 7  | 7.4  | 4  | 7.1  | 11  | 7.3 |
| 22    | 5  | 5.3  | 2  | 3.6  | 7   | 4.6 |
| 23    | 2  | 2.1  | 2  | 3.6  | 4   | 2.7 |
| 24    | 1  | 1.1  | 0  | 0.0  | 1   | 0.7 |
| 25    | 4  | 4.2  | 1  | 1.8  | 5   | 3.3 |
| Total | 95 | 100  | 56 | 100  | 151 | 100 |

---

**Table S2. QUIS scale scores.** This table shows the percentage of respondents, and corresponding frequencies in parentheses, who provided a score from 1 to 9 for each QUIS item (N=151 users). The number of missing responses is shown in parentheses next to each QUIS subscale. Inter-reliability scores are shown with each QUIS scale on the far right.

|                                                   | QUIS Score                                                     | 1        | 2       | 3       | 4        | 5         | 6         | 7         | 8         | 9         |              |
|---------------------------------------------------|----------------------------------------------------------------|----------|---------|---------|----------|-----------|-----------|-----------|-----------|-----------|--------------|
| Overall Reactions<br>( $\alpha=0.90$ )            | Terrible (7)                                                   | 0.7 (1)  | 1.3 (2) | 0.7 (1) | 1.3 (2)  | 4.6 (7)   | 13.3 (20) | 29.1 (44) | 20.5 (31) | 23.8 (36) | Wonderful    |
|                                                   | Frustrating (14)                                               | 3.3 (5)  | 2 (3)   | 3.3 (5) | 4 (6)    | 6 (9)     | 15.2 (23) | 19.9 (30) | 19.9 (30) | 17.2 (26) | Satisfying   |
|                                                   | Dull (19)                                                      | 2 (3)    | 2 (3)   | 1.3 (2) | 1.3 (2)  | 8 (12)    | 35.1 (53) | 15.9 (24) | 13.9 (21) | 8 (12)    | Stimulating  |
|                                                   | Difficult (15)                                                 | 3.3 (5)  | 2 (3)   | 0.7 (1) | 2 (3)    | 4.6 (7)   | 15.9 (24) | 16.6 (25) | 23.2 (35) | 21.9 (33) | Easy         |
|                                                   | Rigid (18)                                                     | 1.3 (2)  | 4.6 (7) | 1.3 (2) | 7.3 (11) | 12.6 (19) | 20.5 (31) | 21.2 (32) | 7.3 (11)  | 11.9 (18) | Flexible     |
|                                                   | Unhelpful (16)                                                 | 0.7 (1)  | 0.7 (1) | 1.3 (2) | 2.7 (4)  | 3.3 (5)   | 8.6 (13)  | 13.3 (20) | 25.2 (38) | 33.8 (51) | Informative  |
| Screen ( $\alpha=0.82$ )                          | Characters on the computer screen: Hard to Read (6)            | 0.7 (1)  | 1.3 (2) | 0 (0)   | 2.7 (4)  | 4 (6)     | 13.3 (20) | 20.5 (31) | 22.5 (34) | 31.1 (47) | Easy to Read |
|                                                   | Highlighting on the screen: Unhelpful (6)                      | 1.3 (2)  | 0 (0)   | 0.7 (1) | 2 (3)    | 6 (9)     | 19.2 (29) | 22.5 (34) | 25.2 (38) | 19.2 (29) | Helpful      |
|                                                   | Screen layouts were helpful: Never (10)                        | 0 (0)    | 0 (0)   | 3.3 (5) | 2.7 (4)  | 9.9 (15)  | 19.2 (29) | 29.8 (45) | 16.6 (25) | 11.9 (18) | Always       |
|                                                   | Sequence of screens: Confusing (9)                             | 0.7 (1)  | 2 (3)   | 3.3 (5) | 5.3 (8)  | 5.3 (8)   | 22.5 (34) | 19.9 (30) | 22.5 (34) | 12.6 (19) | Clear        |
|                                                   | I need to scroll to review information: Never (14)             | 3.3 (5)  | 4 (6)   | 4 (6)   | 4 (6)    | 6 (9)     | 21.9 (33) | 10.6 (16) | 20.5 (31) | 16.6 (25) | Always       |
|                                                   | Satisfaction with scrolling amount: Frustrated (10)            | 2 (3)    | 2.7 (4) | 4 (6)   | 8.6 (13) | 9.9 (15)  | 23.8 (36) | 19.2 (29) | 15.2 (23) | 8 (12)    | Satisfied    |
| Terminology & System Information ( $\alpha=.85$ ) | Use of terminology throughout the system: Inconsistent (12)    | 0 (0)    | 0 (0)   | 2 (3)   | 0.7 (1)  | 4 (6)     | 12.6 (19) | 23.8 (36) | 23.8 (36) | 25.2 (38) | Consistent   |
|                                                   | Terminology relates well to the work you are doing: Never (12) | 6.6 (10) | 3.3 (5) | 5.3 (8) | 2 (3)    | 2 (3)     | 11.3 (17) | 21.2 (32) | 20.5 (31) | 19.9 (30) | Always       |
|                                                   | Messages which appear on the screen: Inconsistent (23)         | 0.7 (1)  | 0.7 (1) | 1.3 (2) | 2.7 (4)  | 13.3 (20) | 19.9 (30) | 20.5 (31) | 11.3 (17) | 14.6 (22) | Consistent   |
|                                                   | Messages which appear on the screen: Confusing (22)            | 0 (0)    | 1.3 (2) | 0.7 (1) | 2.7 (4)  | 8 (12)    | 19.9 (30) | 20.5 (31) | 13.9 (21) | 18.5 (28) | Clear        |

|                                       |                                                                   |                                                        |         |         |         |           |           |           |           |           |                 |        |
|---------------------------------------|-------------------------------------------------------------------|--------------------------------------------------------|---------|---------|---------|-----------|-----------|-----------|-----------|-----------|-----------------|--------|
| Learning ( $\alpha=0.90$ )            | Computer keeps you informed about what it is doing: Never (19)    | 2.7 (4)                                                | 2 (3)   | 2.7 (4) | 3.3 (5) | 5.3 (8)   | 23.8 (36) | 18.5 (28) | 16.6 (25) | 12.6 (19) | Always          |        |
|                                       | Error Messages: Unhelpful (30)                                    | 1.3 (2)                                                | 1.3 (2) | 2.7 (4) | 2.7 (4) | 10.6 (16) | 25.2 (38) | 13.3 (20) | 12.6 (19) | 10.6 (16) | Helpful         |        |
|                                       | Learning to operate the system: Difficult (12)                    | 0.7 (1)                                                | 0.7 (1) | 4 (6)   | 3.3 (5) | 6 (9)     | 13.3 (20) | 17.2 (26) | 19.2 (29) | 27.8 (42) | Easy            |        |
|                                       | Remembering names and uses of commands: Difficult (16)            | 0.7 (1)                                                | 2 (3)   | 2 (3)   | 2 (3)   | 8.6 (13)  | 15.9 (24) | 16.6 (25) | 21.9 (33) | 19.9 (30) | Easy            |        |
|                                       | Tasks can be performed in a straightforward manner: Never (13)    | 0.7 (1)                                                | 1.3 (2) | 3.3 (5) | 2.7 (4) | 2.7 (4)   | 18.5 (28) | 18.5 (28) | 25.2 (38) | 18.5 (28) | Always          |        |
|                                       | Shortcuts are available to perform repetitive tasks: Never (24)   | 5.3 (8)                                                | 2.7 (4) | 6 (9)   | 5.3 (8) | 6.6 (10)  | 23.8 (36) | 16.6 (25) | 9.3 (14)  | 8.6 (13)  | Always          |        |
|                                       | Help is available where needed: Never (22)                        | 2 (3)                                                  | 3.3 (5) | 4 (6)   | 6 (9)   | 8.6 (13)  | 22.5 (34) | 15.2 (23) | 11.9 (18) | 11.9 (18) | Always          |        |
|                                       | Exploration of features by trial and error: Discouraging (20)     | 1.3 (2)                                                | 0.7 (1) | 1.3 (2) | 2.7 (4) | 8 (12)    | 19.9 (30) | 23.8 (36) | 15.2 (23) | 13.9 (21) | Helpful         |        |
|                                       | System speed: Too Slow (10)                                       | 0 (0)                                                  | 0.7 (1) | 3.3 (5) | 3.3 (5) | 8 (12)    | 19.2 (29) | 23.2 (35) | 20.5 (31) | 15.2 (23) | Fast Enough     |        |
|                                       | The system is reliable: Never (11)                                | 0 (0)                                                  | 0.7 (1) | 1.3 (2) | 3.3 (5) | 3.3 (5)   | 15.9 (24) | 28.5 (43) | 23.8 (36) | 15.9 (24) | Always          |        |
| System Capabilities ( $\alpha=0.72$ ) | Log-on process: Difficult (15)                                    | 4 (6)                                                  | 2 (3)   | 4.6 (7) | 2 (3)   | 4.6 (7)   | 15.9 (24) | 13.9 (21) | 13.9 (21) | 29.1 (44) | Easy            |        |
|                                       | Correcting your mistakes: Difficult (33)                          | 0.7 (1)                                                | 1.3 (2) | 2.7 (4) | 1.3 (2) | 4.6 (7)   | 23.2 (35) | 16.6 (25) | 11.3 (17) | 16.6 (25) | Easy            |        |
|                                       | Ease of operation depends on your level of experience: Never (14) | 2 (3)                                                  | 1.3 (2) | 2.7 (4) | 2 (3)   | 4.6 (7)   | 23.2 (35) | 19.9 (30) | 19.2 (29) | 15.9 (24) | Always          |        |
|                                       | System Functionality ( $\alpha=0.90$ )                            | Grouping patient records: Difficult (19)               | 4 (6)   | 0.7 (1) | 2 (3)   | 3.3 (5)   | 9.3 (14)  | 19.9 (30) | 16.6 (25) | 12.6 (19) | 19.2 (29)       | Easy   |
|                                       |                                                                   | The suggested patient grouping is reliable: Never (20) | 2 (3)   | 0.7 (1) | 1.3 (2) | 3.3 (5)   | 6 (9)     | 21.9 (33) | 19.2 (29) | 19.9 (30) | 12.6 (19)       | Always |
| The view of lab data: Cumbersome (13) |                                                                   | 4.6 (7)                                                | 3.3 (5) | 4 (6)   | 4.6 (7) | 4.6 (7)   | 19.2 (29) | 19.2 (29) | 15.2 (23) | 16.6 (25) | Straightforward |        |

|                                                                   |         |         |         |          |          |           |           |           |           |                 |
|-------------------------------------------------------------------|---------|---------|---------|----------|----------|-----------|-----------|-----------|-----------|-----------------|
| Reviewing encounter summaries: Cumbersome (15)                    | 2 (3)   | 2 (3)   | 3.3 (5) | 2.7 (4)  | 8 (12)   | 17.2 (26) | 21.2 (32) | 14.6 (22) | 19.2 (29) | Straightforward |
| Developing a synopsis of the patient: Difficult (15)              | 1.3 (2) | 2 (3)   | 4.6 (7) | 6 (9)    | 6.6 (10) | 25.8 (39) | 16.6 (25) | 13.9 (21) | 13.3 (20) | Easy            |
| The data needed to care for patients are usually: Incomplete (15) | 4.6 (7) | 1.3 (2) | 0.7 (1) | 6.6 (10) | 4 (6)    | 23.2 (35) | 22.5 (34) | 14.6 (22) | 12.6 (19) | Complete        |
